# Supplementary material
Source: PubMed Central journal article supplement (PMC4376291)
Supplement: Supp_Fig2.pdf [file Supp_Fig2.pdf]

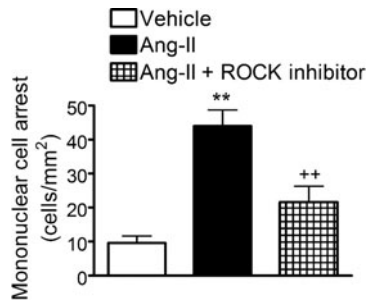

**SUPPLEMENTARY FIG. S2. Rho-associated protein kinase (ROCK) inhibition impairs angiotensin II (Ang-II)-induced mononuclear cell arrest.** Endothelial cells were pretreated with the ROCK inhibitor Y27632 ( $10 \mu M$ ) 1 h before Ang-II stimulation ( $1 \mu M$ , 4 h). Then, freshly isolated human mononuclear cells were perfused over the endothelial monolayers for 5 min at  $0.5 \text{ dyn/cm}^2$  and leukocyte adhesion was quantified. Results are the mean  $\pm$  SEM of at least 5 independent experiments; \*\* $p < 0.01$  relative to the vehicle group, ++ $p < 0.01$  relative to the Ang-II-stimulated cells.
