# Supplementary material
Source: PubMed Central journal article supplement (PMC4376291)
Supplement: Supp_Fig4.pdf [file Supp_Fig4.pdf]

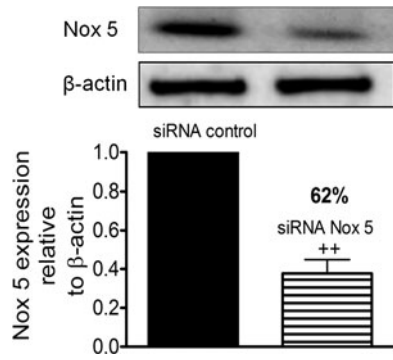

**SUPPLEMENTARY FIG. S4. Transfection of HUAEC with Nox5-specific siRNA.** Gene silencing was performed in HUAECs using either control- or Nox5-specific siRNA. After 48 h, protein expression of Nox5 was determined by immunoblot to assess silencing efficiency. Results (mean  $\pm$  SEM of  $n=5$  independent experiments) are expressed relative to  $\beta$ -actin. A representative blot is shown.  $^{++}p < 0.01$  relative to values in control siRNA-transfected cells.
