# Supplementary material
Source: PubMed Central journal article supplement (PMC4376291)
Supplement: Supp_Table3.pdf [file Supp_Table3.pdf]

SUPPLEMENTARY TABLE S3. SUBOPTIMAL DOSES OF ROSU + BEX HAVE NO EFFECT ON BLOOD GLUCOSE LEVELS AND LIPID PROFILE IN APOE<sup>-/-</sup> MICE SUBJECTED TO AN ATHEROGENIC DIET

|                           | <i>ApoE<sup>-/-</sup></i><br><i>mice + control</i><br><i>diet</i> | <i>ApoE<sup>-/-</sup></i><br><i>mice + atherogenic</i><br><i>diet</i> | <i>ApoE<sup>-/-</sup></i><br><i>mice + atherogenic</i><br><i>diet + Rosu</i> | <i>ApoE<sup>-/-</sup></i><br><i>mice + atherogenic</i><br><i>diet + Bex</i> | <i>ApoE<sup>-/-</sup></i><br><i>mice + atherogenic</i><br><i>diet + Rosu + Bex</i> |
|---------------------------|-------------------------------------------------------------------|-----------------------------------------------------------------------|------------------------------------------------------------------------------|-----------------------------------------------------------------------------|------------------------------------------------------------------------------------|
| Blood glucose (mg/dl)     | 86.9 ± 6.6                                                        | 92.3 ± 8.4                                                            | 84.0 ± 6.4                                                                   | 87.6 ± 5.2                                                                  | 86.6 ± 6.0                                                                         |
| Total cholesterol (mg/dl) | 168.7 ± 7.6                                                       | 320.3 ± 22.8 <sup>a</sup>                                             | 275.5 ± 20.6 <sup>a</sup>                                                    | 306.1 ± 40.8 <sup>a</sup>                                                   | 291.1 ± 23.5 <sup>a</sup>                                                          |
| Triglycerides (mg/dl)     | 70.4 ± 5.6                                                        | 113.3 ± 19.2 <sup>a</sup>                                             | 111.1 ± 14.6 <sup>a</sup>                                                    | 130.8 ± 8.5 <sup>a</sup>                                                    | 125.5 ± 13.0 <sup>a</sup>                                                          |

Mice were sacrificed at 16 weeks of age after 8 weeks on a low-fat standard diet (control diet), high-fat atherogenic diet (atherogenic diet), or high-fat atherogenic diet treated with Rosu (1.25 mg/kg/day delivered by osmotic minipumps), Bex (10 mg/kg/day) by gavage, or with a combination of both drugs. Circulating levels of glucose, total cholesterol, and triglycerides were evaluated. Results are the mean ± SEM of *n* = 5 animals per group.

<sup>a</sup>*p* < 0.05 relative to values in animals subjected to a control diet.
